# Supplementary material for: Phenotypic and Target-Directed Screening Yields New Acaricidal Alternatives for the Control of Ticks
Source: MDPI journal article supplement (doi:10.3390/molecules27248863), 2022-12-13
Supplement: s1 [file s1]

**Table S1.** Plant collection: general plant information, and extract production yields.

| Common name          | Scientific name                   | Location                                                | Collection date | Part of the plant used | MeOH extract (g) | CH <sub>2</sub> Cl <sub>2</sub> extract (g) | Initial sample (g) | Extraction Yield (%) |
|----------------------|-----------------------------------|---------------------------------------------------------|-----------------|------------------------|------------------|---------------------------------------------|--------------------|----------------------|
| Bejuco de playa      | <i>Ipomoea pes-caprae</i>         | Tulum Beach (20°11'52.00"N; 87°26'12.38"O)              | may-14          | leaves and branches    | 20,2 (T25)*      | 2,4 (T33)                                   | 132                | 17                   |
| Nance                | <i>Byrsonima crassifolia</i>      | Ecological Park Chetumal (18°30'21.25"N; 88°19'12.79"O) | sep-13          | tree bark              | 35,5 (T27)       | 12,6 (T28)                                  | 200                | 24                   |
| Uva de mar           | <i>Coccoloba uvifera</i>          | Chetumal bay (18°31'1.79"N; 88°16'14.46"O)              | may-14          | leaves                 | 40,0 (T24)       | 4 (T23)                                     | 214                | 21                   |
| pucte, puk'te(maya). | <i>Terminalia catappa</i> L.      | Chetumal city (18°31'0.55"N; 88°18'50.27"O)             | may-14          | leaves                 | 27,9 (T13)       | 9 (T6)                                      | 250                | 15                   |
|                      |                                   |                                                         |                 | flowers                | 12,2 (T34)       | nd(T42)                                     | 113                | 11                   |
|                      |                                   |                                                         |                 | fruit                  | 27,9 (T35)       | nd(T41)                                     | 362                | 8                    |
| Elemuy               | <i>Malmea depressa</i>            | Santa Rosa town (19°57'51.90"N; 88°16'17.00"O)          | may-14          | leaves and branches    | 25,6 (T19)       | 4                                           | 164                | 18                   |
| Elemuy               | <i>Malmea depressa</i>            | Santa Rosa town (19°57'51.90"N; 88°16'17.00"O)          | may-14          | root                   | 9,5 (T20)        | 2,6 (T21)                                   | 187                | 6                    |
| Waxim                | <i>Leucaena leucocephala</i>      | Chetumal city (18°31'17.48"N; 88°18'47.94"O)            | may-14          | leaves and branches    | 26,8 (T2)        | 9 (T8)                                      | 273                | 13                   |
| Chaya                | <i>Cnidoscolus chayamansa</i>     | Chetumal city (18°31'0.55"N; 88°18'50.27"O)             | may-14          | leaves                 | 16,7 (T3)        | 2 (T4)                                      | 100                | 19                   |
| Guarumbo             | <i>Cecropia obtusifolia</i>       | Chetumal city (18°31'26.60"N; 88°18'49.84"O)            | may-14          | leaves                 | 16,7 (T5)        | 4,5 (T22)                                   | 150                | 14                   |
| sutup (maya).        | <i>Helicteres baruensis</i> Jacq. | Tulum Beach (20°11'59.42"N; 87°26'53.68"O)              | may-14          | leaves and branches    | 10,6 (T11)       | 6 (T14)                                     | 113                | 15                   |
| habanero             | <i>Capsicum chinense</i> Jacq.    | F. Carrillo Puerto town (19°34'50.49"N; 88° 2'39.57"O)  | may-14          | fruit                  | 11,3 (T31)       | 5 (T38)                                     | 55                 | 21                   |

\* Nomenclature used for classifying the prepared extract.

Table S2. Data for the phenotypic screening.

| Chemical<br>collection<br>code | Structure                                                                           | % of growth<br>inhibition |
|--------------------------------|-------------------------------------------------------------------------------------|---------------------------|
| 906                            | 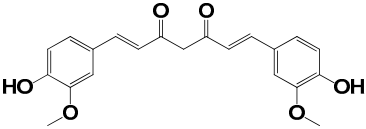   | 95                        |
| 795                            |    | 80                        |
| 796                            |    | 93                        |
| 1019                           |    | 0                         |
| 793                            |    | 7                         |
| 809                            |   | 50                        |
| 1223                           |  | 0                         |
| 1018                           |  | 0                         |
| 1140                           |  | 0                         |
| 137                            |  | 0                         |
| 133                            |  | 71                        |
| 900                            |  | 0                         |
| 909                            |  | 0                         |
| 266                            |  | 77                        |

|      |                                                                                      |    |
|------|--------------------------------------------------------------------------------------|----|
| 901  | 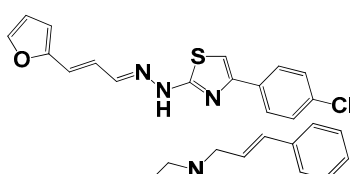    | 25 |
| 50   |     | 33 |
| 903  |     | 75 |
| 912  |     | 52 |
| 874  |     | 17 |
| 1105 |    | 0  |
| 1125 |   | 0  |
| 735  |   | 0  |
| 715  |   | 64 |
| 116  |   | 18 |
| 791  |  | 8  |
| 716  |   | 12 |
| 879  |   | 9  |
| 183  |   | 62 |

|      |                                                                                    |    |
|------|------------------------------------------------------------------------------------|----|
| 181  | 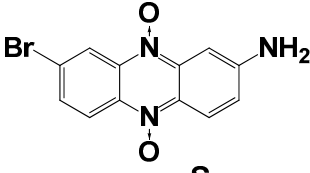  | 90 |
| 191  |   | 20 |
| 813  |   | 20 |
| 690  |   | 0  |
| 885  |   | 91 |
| 1253 |  | 95 |

|   | Extract details                                                     | % of growth inhibition |
|---|---------------------------------------------------------------------|------------------------|
| 1 | <i>Croton spp.</i><br>(CH <sub>2</sub> Cl <sub>2</sub> )            | 19                     |
| 2 | <i>Leucaena leucocephala</i><br>(MeOH)                              | 70                     |
| 3 | <i>Cnidoscolus chayamansa</i><br>(MeOH)                             | 63                     |
| 4 | <i>Cnidoscolus chayamansa</i><br>(CH <sub>2</sub> Cl <sub>2</sub> ) | 100                    |
| 5 | <i>Cecropia obtusifolia</i><br>(MeOH)                               | 0                      |
| 6 | <i>Terminalia catappa</i><br>(CH <sub>2</sub> Cl <sub>2</sub> )     | 2                      |
| 7 | <i>Pluchea spp.</i>                                                 | 40                     |

|    |                                                                        |     |
|----|------------------------------------------------------------------------|-----|
|    | (MeOH)                                                                 |     |
| 8  | <i>Leucaena leucocephala</i><br>(CH <sub>2</sub> Cl <sub>2</sub> )     | 72  |
| 9  | <i>Byrsonima crassifolia</i><br>precipitated solid                     | 26  |
| 10 | <i>Ipomoea pes-caprae</i> precipitated<br>solid                        | 0   |
| 11 | <i>Helicteres baruensis</i> Jacq<br>(MeOH)                             | 21  |
| 12 | <i>Croton</i> spp.<br>(MeOH)                                           | 2   |
| 13 | <i>Terminalia catappa</i><br>(MeOH)                                    | 28  |
| 14 | <i>Helicteres baruensis</i> Jacq<br>(CH <sub>2</sub> Cl <sub>2</sub> ) | 0   |
| 15 | <i>Ambrosia hispida</i><br>(MeOH)                                      | 93  |
| 16 | <i>Amphipterygium adstringens</i><br>(MeOH)                            | 0   |
| 17 | <i>Byrsonima crassifolia</i><br>recrystallized solid                   | 14  |
| 18 | <i>Byrsonima crassifolia</i> second<br>precipitated solid              | 12  |
| 19 | <i>Malmea depressa</i><br>(MeOH)                                       | 63  |
| 20 | <i>Malmea depressa</i><br>root (MeOH)                                  | 14  |
| 21 | <i>Malmea depressa</i><br>root (CH <sub>2</sub> Cl <sub>2</sub> )      | 0   |
| 22 | <i>Cecropia obtusifolia</i><br>(CH <sub>2</sub> Cl <sub>2</sub> )      | 100 |

|    |                                                                                   |    |
|----|-----------------------------------------------------------------------------------|----|
| 23 | <i>Coccoloba uvifera</i><br>(CH <sub>2</sub> Cl <sub>2</sub> )                    | 0  |
| 24 | <i>Coccoloba uvifera</i><br>(MeOH)                                                | 28 |
| 25 | <i>Ipomoea pes-caprae</i> (MeOH)                                                  | 70 |
| 26 | <i>Ambrosia hispida</i><br>(CH <sub>2</sub> Cl <sub>2</sub> )                     | 47 |
| 27 | <i>Byrsonima</i><br><i>crassifolia</i> (MeOH)                                     | 0  |
| 28 | <i>Byrsonima</i><br><i>crassifolia</i> (CH <sub>2</sub> Cl <sub>2</sub> )         | 49 |
| 29 | <i>Pluchea spp.</i><br>(CH <sub>2</sub> Cl <sub>2</sub> )                         | 9  |
| 30 | <i>Aristolochia spp.</i><br>(MeOH)                                                | 14 |
| 31 | <i>Capsicum chinese</i><br>(MeOH)                                                 | 0  |
| 32 | <i>Ruellia nudiflora</i><br>(Engelm. & A. Gray)<br>Urb. (MeOH)                    | 0  |
| 33 | <i>Ipomoea pes-caprae</i> (CH <sub>2</sub> Cl <sub>2</sub> )                      | 14 |
| 34 | <i>Cassia fistula</i><br>flowers (MeOH)                                           | 0  |
| 35 | <i>Cassia fistula</i> fruit<br>(MeOH)                                             | 0  |
| 36 | <i>Aristolochia spp.</i><br>(CH <sub>2</sub> Cl <sub>2</sub> )                    | 0  |
| 37 |                                                                                   | 0  |
| 38 | <i>Capsicum chinese</i><br>(CH <sub>2</sub> Cl <sub>2</sub> )                     | 0  |
| 39 | <i>Amphipterygium</i><br><i>adstringens</i><br>(CH <sub>2</sub> Cl <sub>2</sub> ) | 28 |
| 41 | <i>Cassia fistula</i> fruit<br>(CH <sub>2</sub> Cl <sub>2</sub> )                 | 0  |

|    |                                                                     |     |
|----|---------------------------------------------------------------------|-----|
| 42 | <i>Cassia fistula</i><br>flowers (CH <sub>2</sub> Cl <sub>2</sub> ) | 0   |
| 43 | <i>Ruellia nudiflora</i><br>(CH <sub>2</sub> Cl <sub>2</sub> )      | 0   |
| 44 | <i>Cassia fistula</i> leaves<br>and branches<br>(MeOH)              | 100 |

Table S3. Control percentage of the TIA in 8 ticks of the population of multiresistant field for compound 885 at 3 mM.

| compound | % Control |    |    |    |    |    |    |    |
|----------|-----------|----|----|----|----|----|----|----|
| 885      | 100       | 48 | 40 | 14 | 46 | 28 | 26 | 24 |

**Procedure for the synthesis of 2-methoxy-4-((E)-2-(5-((E)-ferrocenylvinyl)-1H-pyrazol-3-yl)vinyl)phenol (Mar106).**

A mixture of [(1E,6E)-7-(4-hydroxy-3-methoxyphenyl)-3,5-dioxo-1,6-heptadien-1-yl]ferrocene **Mar105** (150 mg, 0.34 mmol) and hydrazine hydrate (0.5 mL, 3.4 mmol) in glacial acetic acid (10 mL) was stirred at 70 °C for 3 h. The light red solution was then added to crushed ice (~100 mL). The resulting orange solid was filtered, washed with water (×3) and dried under vacuum and P<sub>2</sub>O<sub>5</sub>.

2-Methoxy-4-((E)-2-(5-((E)-ferrocenylvinyl)-1H-pyrazol-3-yl)vinyl)phenol (**Mar106**): Dark orange solid, Yield: 65 mg (52%); <sup>1</sup>H NMR (250 MHz, DMSO-d<sub>6</sub>) δ: 3.83 (s, 3H, OCH<sub>3</sub>), 4.15 (s, 5H, C<sub>5</sub>H<sub>5</sub>), 4.32 (s, 2H, H-3 and H-4 of ferrocenyl), 4.54 (s, 2H, H-2 and H-5 of ferrocenyl), 6.59 (s, 1H, H-4 of pyrazole), 6.66-7.14 (m, 7H, vinylic and aromatic protons), 9.16 (s, 1H, NH), 12.76 (OH).; <sup>13</sup>C NMR (62.5 MHz, DMSO-d<sub>6</sub>) δ: 55.6, 66.7, 67.7, 68.3, 69.0, 79.2, 99.0, 109.4, 109.5, 110.7, 115.6, 118.4, 120.0, 128.4, 131.3, 146.4, 146.9, 147.7, 147.9, 152.8.
